# Supplementary material for: Structural Characterization by NMR of a Double Phosphorylated Chimeric Peptide Vaccine for Treatment of Alzheimer’s Disease
Source: Molecules. 2013 Apr 26;18(5):4929–41. doi: 10.3390/molecules18054929 (PMC6269680; doi:10.3390/molecules18054929)
Supplement: Supplementary file 1 [file molecules-18-04929-s001.pdf]

## Supplementary Information

**Figure S1.**  $^1\text{H}$ -700 MHz spectrum of the AD-specific peptide vaccine Ag85B<sub>241-255</sub>-GPSL-Tau<sub>229-237</sub>[pThr231/pSer235].

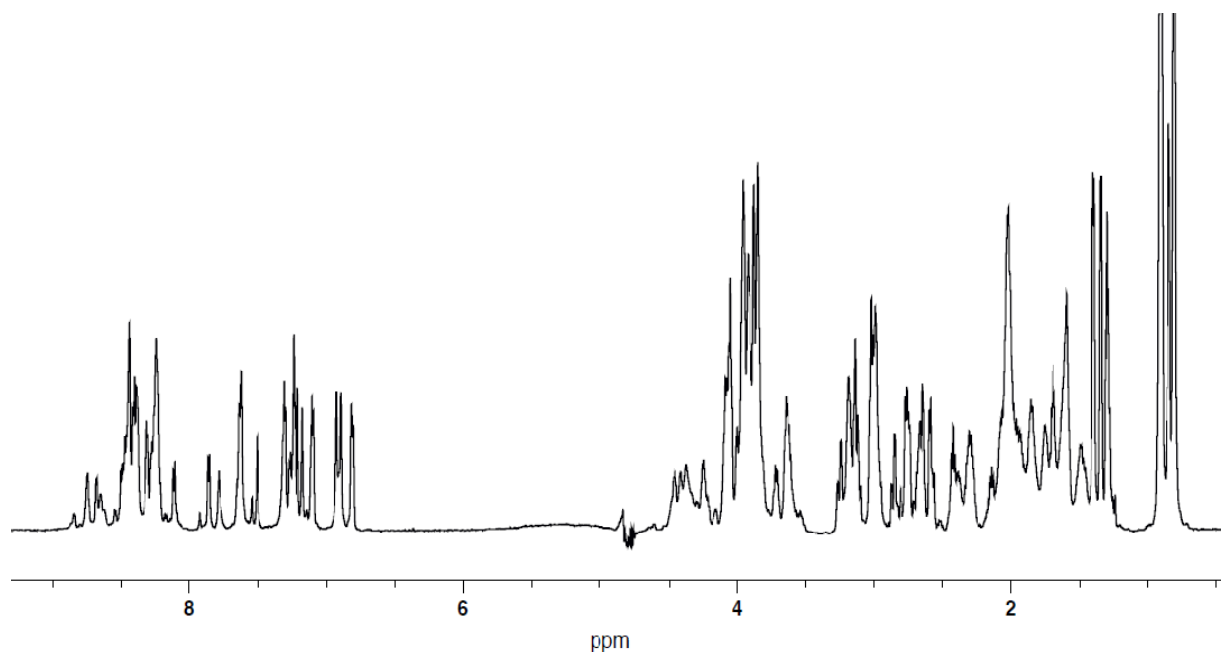

**Figure S2.** TObal Correlation SpectroscopY (TOCSY) spectrum of the AD-specific peptide vaccine Ag85B<sub>241-255</sub>-GPSL-Tau<sub>229-237</sub>[pThr231/pSer235].

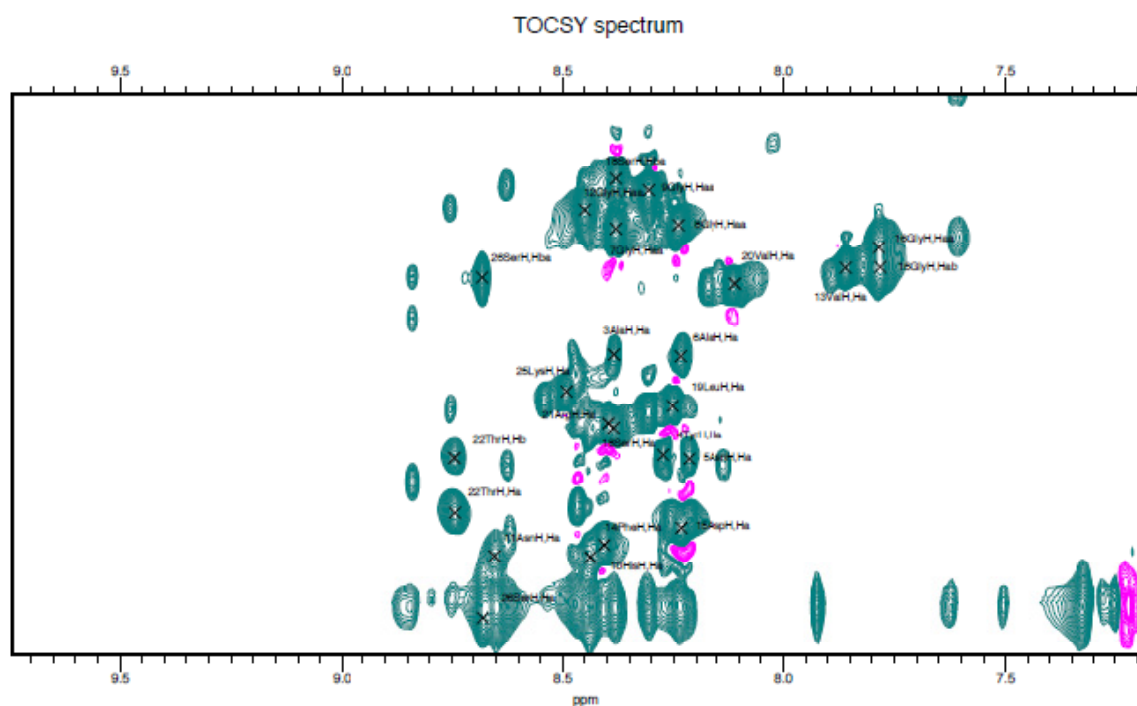

**Table S1.** Chemical shift assignment of the AD-specific peptide vaccine Ag85B<sub>241-255</sub>-GPSL-Tau<sub>229-237</sub>[pThr231/pSer235].

| Amino acid | Atom name | Atom type | Value   |
|------------|-----------|-----------|---------|
| 3Ala       | CO        | 13C       | 178.613 |
| 3Ala       | Cβ        | 13C       | 19.793  |
| 3Ala       | H         | 1H        | 8.384   |
| 3Ala       | Hα        | 1H        | 4.244   |
| 3Ala       | Hβ*       | 1H        | 1.285   |
| 3Ala       | N         | 15N       | 124.155 |
| 4Tyr       | CO        | 13C       | 176.250 |
| 4Tyr       | Cα        | 13C       | 58.820  |
| 4Tyr       | Cβ        | 13C       | 39.167  |
| 4Tyr       | Cδ        | 13C       | 133.706 |
| 4Tyr       | Cε        | 13C       | 118.808 |
| 4Tyr       | Cγ        | 13C       | 131.280 |
| 4Tyr       | H         | 1H        | 8.274   |
| 4Tyr       | Hα        | 1H        | 4.475   |
| 4Tyr       | Hβa       | 1H        | 2.989   |
| 4Tyr       | Hδ*       | 1H        | 7.101   |
| 4Tyr       | Hε*       | 1H        | 6.810   |
| 4Tyr       | N         | 15N       | 119.694 |
| 5Asn       | CO        | 13C       | 176.004 |
| 5Asn       | H         | 1H        | 8.216   |
| 5Asn       | Hα        | 1H        | 4.480   |
| 5Asn       | Hβa       | 1H        | 2.650   |
| 5Asn       | Hβb       | 1H        | 2.758   |
| 5Asn       | Hδ2a      | 1H        | 6.891   |
| 5Asn       | Hδ2b      | 1H        | 7.644   |
| 5Asn       | N         | 15N       | 119.398 |
| 5Asn       | Nδ2       | 15N       | 112.956 |
| 6Ala       | CO        | 13C       | 178.522 |
| 6Ala       | Cα        | 13C       | 53.427  |
| 6Ala       | Cβ        | 13C       | 19.668  |
| 6Ala       | H         | 1H        | 8.234   |
| 6Ala       | Hα        | 1H        | 4.246   |
| 6Ala       | Hβ*       | 1H        | 1.396   |
| 6Ala       | N         | 15N       | 124.996 |
| 7Gly       | Cα        | 13C       | 46.057  |
| 7Gly       | H         | 1H        | 8.380   |
| 7Gly       | Hαa       | 1H        | 3.963   |
| 7Gly       | N         | 15N       | 107.905 |
| 8Gly       | Cα        | 13C       | 45.873  |
| 8Gly       | H         | 1H        | 8.239   |
| 8Gly       | Hαa       | 1H        | 3.953   |
| 8Gly       | N         | 15N       | 108.691 |
| 9Gly       | Cα        | 13C       | 45.816  |
| 9Gly       | H         | 1H        | 8.307   |
| 9Gly       | Hαa       | 1H        | 3.876   |

Table S1. Cont.

| Amino acid | Atom name      | Atom type | Value   |
|------------|----------------|-----------|---------|
| 9Gly       | N              | 15N       | 108.495 |
| 10His      | C $\alpha$     | 13C       | 56.004  |
| 10His      | C $\beta$      | 13C       | 29.800  |
| 10His      | C $\delta$ 2   | 13C       | 120.563 |
| 10His      | C $\epsilon$ 1 | 13C       | 137.120 |
| 10His      | C $\gamma$     | 13C       | 132.426 |
| 10His      | H              | 1H        | 8.438   |
| 10His      | H $\alpha$     | 1H        | 4.702   |
| 10His      | H $\beta$ a    | 1H        | 3.117   |
| 10His      | H $\beta$ b    | 1H        | 3.248   |
| 10His      | H $\delta$ 2   | 1H        | 7.211   |
| 10His      | H $\epsilon$ 1 | 1H        | 8.426   |
| 10His      | N              | 15N       | 118.373 |
| 11Asn      | C $\alpha$     | 13C       | 53.992  |
| 11Asn      | C $\beta$      | 13C       | 39.498  |
| 11Asn      | H              | 1H        | 8.651   |
| 11Asn      | H $\alpha$     | 1H        | 4.703   |
| 11Asn      | H $\beta$ a    | 1H        | 2.754   |
| 11Asn      | H $\beta$ b    | 1H        | 2.861   |
| 11Asn      | H $\delta$ 2a  | 1H        | 6.922   |
| 11Asn      | H $\delta$ 2b  | 1H        | 7.619   |
| 11Asn      | N              | 15N       | 120.193 |
| 11Asn      | N $\delta$ 2   | 15N       | 113.019 |
| 12Gly      | C $\alpha$     | 13C       | 45.988  |
| 12Gly      | H              | 1H        | 8.450   |
| 12Gly      | H $\alpha$ a   | 1H        | 3.918   |
| 12Gly      | N              | 15N       | 109.375 |
| 13Val      | C $\alpha$     | 13C       | 62.965  |
| 13Val      | C $\beta$      | 13C       | 33.271  |
| 13Val      | C $\gamma$ a   | 13C       | 21.356  |
| 13Val      | H              | 1H        | 7.858   |
| 13Val      | H $\alpha$     | 1H        | 4.049   |
| 13Val      | H $\beta$      | 1H        | 1.963   |
| 13Val      | H $\gamma$ a*  | 1H        | 0.807   |
| 13Val      | N              | 15N       | 119.458 |
| 14Phe      | C $\alpha$     | 13C       | 58.112  |
| 14Phe      | C $\beta$      | 13C       | 40.304  |
| 14Phe      | C $\delta$ *   | 13C       | 132.464 |
| 14Phe      | C $\epsilon$ * | 13C       | 131.936 |
| 14Phe      | C $\gamma$     | 13C       | 139.659 |
| 14Phe      | C $\xi$        | 13C       | 130.393 |
| 14Phe      | H              | 1H        | 8.406   |
| 14Phe      | H $\alpha$     | 1H        | 4.679   |
| 14Phe      | H $\beta$ a    | 1H        | 2.966   |
| 14Phe      | H $\beta$ b    | 1H        | 3.155   |
| 14Phe      | H $\delta$ *   | 1H        | 7.236   |

Table S1. Cont.

| Amino acid | Atom name      | Atom type | Value   |
|------------|----------------|-----------|---------|
| 14Phe      | H $\epsilon^*$ | 1H        | 7.304   |
| 14Phe      | H $\xi$        | 1H        | 7.265   |
| 14Phe      | N              | 15N       | 123.887 |
| 15Asp      | CO             | 13C       | 176.355 |
| 15Asp      | C $\alpha$     | 13C       | 54.609  |
| 15Asp      | H              | 1H        | 8.233   |
| 15Asp      | H $\alpha$     | 1H        | 4.644   |
| 15Asp      | H $\beta$ a    | 1H        | 2.650   |
| 15Asp      | H $\beta$ b    | 1H        | 2.745   |
| 15Asp      | N              | 15N       | 122.855 |
| 16Gly      | H              | 1H        | 7.784   |
| 16Gly      | H $\alpha$ a   | 1H        | 4.025   |
| 16Gly      | CO             | 13C       | 176.434 |
| 16Gly      | C $\alpha$     | 13C       | 45.536  |
| 16Gly      | N              | 15N       | 108.966 |
| 17Pro      | H $\alpha$     | 1H        | 4.454   |
| 17Pro      | H $\beta$ a    | 1H        | 1.927   |
| 17Pro      | H $\beta$ b    | 1H        | 2.295   |
| 17Pro      | H $\delta$ a   | 1H        | 3.629   |
| 17Pro      | H $\delta$ b   | 1H        | 3.642   |
| 17Pro      | H $\gamma$ a   | 1H        | 2.024   |
| 17Pro      | H $\gamma$ b   | 1H        | 2.298   |
| 17Pro      | C $\alpha$     | 13C       | 64.187  |
| 17Pro      | C $\beta$      | 13C       | 32.836  |
| 17Pro      | C $\delta$     | 13C       | 50.547  |
| 17Pro      | C $\gamma$     | 13C       | 28.038  |
| 18Ser      | H              | 1H        | 8.381   |
| 18Ser      | H $\alpha$     | 1H        | 4.412   |
| 18Ser      | H $\beta$      | 1H        | 3.849   |
| 18Ser      | CO             | 13C       | 177.637 |
| 18Ser      | C $\alpha$     | 13C       | 59.021  |
| 18Ser      | C $\beta$      | 13C       | 64.260  |
| 18Ser      | N              | 15N       | 115.746 |
| 19Leu      | H              | 1H        | 8.252   |
| 19Leu      | H $\alpha$     | 1H        | 4.360   |
| 19Leu      | H $\beta$      | 1H        | 1.592   |
| 19Leu      | H $\delta$ a*  | 1H        | 0.848   |
| 19Leu      | H $\delta$ b*  | 1H        | 0.900   |
| 19Leu      | H $\gamma$     | 1H        | 1.605   |
| 19Leu      | CO             | 13C       | 177.656 |
| 19Leu      | C $\alpha$     | 13C       | 56.261  |
| 19Leu      | C $\beta$      | 13C       | 42.934  |
| 19Leu      | C $\delta$ a   | 13C       | 24.186  |
| 19Leu      | C $\delta$ b   | 13C       | 25.475  |
| 19Leu      | C $\gamma$     | 13C       | 27.646  |
| 19Leu      | N              | 15N       | 124.652 |
| 20Val      | CO             | 13C       | 176.294 |

Table S1. Cont.

| Amino acid | Atom name     | Atom type | Value   |
|------------|---------------|-----------|---------|
| 20Val      | C $\alpha$    | 13C       | 62.763  |
| 20Val      | C $\beta$     | 13C       | 33.209  |
| 20Val      | C $\gamma$ a  | 13C       | 21.650  |
| 20Val      | H             | 1H        | 8.112   |
| 20Val      | H $\alpha$    | 1H        | 4.088   |
| 20Val      | H $\beta$     | 1H        | 2.030   |
| 20Val      | H $\gamma$ a* | 1H        | 0.912   |
| 20Val      | N             | 15N       | 121.738 |
| 21Arg      | CO            | 13C       | 175.057 |
| 21Arg      | C $\alpha$    | 13C       | 56.388  |
| 21Arg      | C $\beta$     | 13C       | 31.716  |
| 21Arg      | C $\gamma$    | 13C       | 27.512  |
| 21Arg      | H             | 1H        | 8.396   |
| 21Arg      | H $\alpha$    | 1H        | 4.401   |
| 21Arg      | H $\beta$ a   | 1H        | 1.751   |
| 21Arg      | H $\beta$ b   | 1H        | 1.854   |
| 21Arg      | H $\delta$ a  | 1H        | 3.187   |
| 21Arg      | H $\epsilon$  | 1H        | 7.325   |
| 21Arg      | H $\gamma$ a  | 1H        | 1.622   |
| 21Arg      | H $\xi$ *     | 1H        | 1.293   |
| 21Arg      | N             | 15N       | 125.856 |
| 21Arg      | Ne            | 15N       | 84.990  |
| 22Thr      | C $\alpha$    | 13C       | 60.572  |
| 22Thr      | C $\beta$     | 13C       | 73.766  |
| 22Thr      | C $\gamma$ 2  | 13C       | 21.244  |
| 22Thr      | H             | 1H        | 8.743   |
| 22Thr      | H $\alpha$    | 1H        | 4.605   |
| 22Thr      | H $\beta$     | 1H        | 4.476   |
| 22Thr      | H $\gamma$ 2* | 1H        | 1.340   |
| 22Thr      | N             | 15N       | 119.675 |
| 23Pro      | C $\alpha$    | 13C       | 62.347  |
| 23Pro      | C $\beta$     | 13C       | 31.583  |
| 23Pro      | C $\delta$    | 13C       | 31.796  |
| 23Pro      | C $\gamma$    | 13C       | 28.197  |
| 23Pro      | H $\alpha$    | 1H        | 4.658   |
| 23Pro      | H $\beta$ a   | 1H        | 1.861   |
| 23Pro      | H $\beta$ b   | 1H        | 2.378   |
| 23Pro      | H $\delta$ a  | 1H        | 3.715   |
| 23Pro      | H $\delta$ b  | 1H        | 3.945   |
| 23Pro      | H $\gamma$ a  | 1H        | 1.997   |
| 23Pro      | H $\gamma$ b  | 1H        | 2.083   |
| 24Pro      | C $\alpha$    | 13C       | 63.616  |
| 24Pro      | C $\beta$     | 13C       | 33.050  |
| 24Pro      | C $\delta$    | 13C       | 51.030  |
| 24Pro      | C $\gamma$    | 13C       | 28.087  |
| 24Pro      | H $\alpha$    | 1H        | 4.449   |
| 24Pro      | H $\beta$ a   | 1H        | 1.907   |

Table S1. Cont.

| Amino acid | Atom name | Atom type | Value   |
|------------|-----------|-----------|---------|
| 24Pro      | Hβb       | 1H        | 2.298   |
| 24Pro      | Hδa       | 1H        | 3.637   |
| 24Pro      | Hδb       | 1H        | 3.810   |
| 24Pro      | Hγa       | 1H        | 2.023   |
| 25Lys      | CO        | 13C       | 177.060 |
| 25Lys      | Cα        | 13C       | 56.646  |
| 25Lys      | Cβ        | 13C       | 33.851  |
| 25Lys      | Cδ        | 13C       | 29.606  |
| 25Lys      | Cε        | 13C       | 42.772  |
| 25Lys      | Cγ        | 13C       | 25.117  |
| 25Lys      | H         | 1H        | 8.491   |
| 25Lys      | Hα        | 1H        | 4.326   |
| 25Lys      | Hβa       | 1H        | 1.758   |
| 25Lys      | Hβb       | 1H        | 1.831   |
| 25Lys      | Hδa       | 1H        | 1.699   |
| 25Lys      | Hεa       | 1H        | 3.020   |
| 25Lys      | Hγa       | 1H        | 1.487   |
| 25Lys      | N         | 15N       | 122.431 |
| 26Ser      | CO        | 13C       | 173.601 |
| 26Ser      | Cβ        | 13C       | 66.117  |
| 26Ser      | H         | 1H        | 8.679   |
| 26Ser      | Hα        | 1H        | 4.834   |
| 26Ser      | Hβa       | 1H        | 4.070   |
| 26Ser      | N         | 15N       | 118.769 |

Table S2.  $^3J_{\text{HN-H}\alpha}$  analysis from experimental data (Exp) and Flexible Meccano (FM) ensemble.

| Amino acid | $^3J_{\text{HN-H}\alpha}$ Exp<br>(Hz) <sup>a</sup> | $^3J_{\text{HN-H}\alpha}$ FM<br>(Hz) | $\Delta J = J_{\text{Exp}} - J_{\text{FM}}$ |
|------------|----------------------------------------------------|--------------------------------------|---------------------------------------------|
| 1Gln       |                                                    | 7.1                                  |                                             |
| 2Asp       |                                                    |                                      |                                             |
| 3Ala       |                                                    | 6.3                                  |                                             |
| 4Tyr       | 7.0                                                | 7.6                                  | -0.6                                        |
| 5Asn       |                                                    | 7.5                                  |                                             |
| 6Ala       | 6.0                                                | 6.3                                  | -0.4                                        |
| 7Gly       | 5.9                                                | 6.2                                  | -0.3                                        |
| 8Gly       | 6.1                                                | 6.2                                  | -0.1                                        |
| 9Gly       | 6.0                                                | 6.2                                  | -0.2                                        |
| 10His      |                                                    | 7.4                                  |                                             |
| 11Asn      |                                                    | 7.5                                  |                                             |
| 12Gly      | 7.1                                                | 6.2                                  | 0.9                                         |
| 13Val      | 7.8                                                | 7.8                                  | 0.0                                         |
| 14Phe      | 7.5                                                | 7.5                                  | -0.1                                        |
| 15Asp      | 7.7                                                | 7.2                                  | 0.5                                         |
| 16Gly      | 5.7                                                | 5.7                                  | 0.1                                         |
| 17Pro      |                                                    |                                      |                                             |
| 18Ser      | 7.0                                                | 6.9                                  | 0.1                                         |

Table S2. Cont.

| Amino acid | $^3J_{\text{HN-H}\alpha}$ Exp<br>(Hz) <sup>a</sup> | $^3J_{\text{HN-H}\alpha}$ FM<br>(Hz) | $\Delta J = J_{\text{Exp}} - J_{\text{FM}}$ |
|------------|----------------------------------------------------|--------------------------------------|---------------------------------------------|
| 19Leu      |                                                    | 7.3                                  |                                             |
| 20Val      | 8.0                                                | 7.8                                  | 0.1                                         |
| 21Arg      | 7.1                                                | 7.2                                  | -0.1                                        |
| 22Thr      |                                                    | 7.8                                  |                                             |
| 23Pro      |                                                    |                                      |                                             |
| 24Pro      |                                                    |                                      |                                             |
| 25Lys      | 7.0                                                | 7.2                                  | -0.1                                        |
| 26Ser      |                                                    | 7.8                                  |                                             |
| 27Pro      |                                                    |                                      |                                             |
| 28Ser      |                                                    |                                      |                                             |

a. The digital resolution of DQF-COSY spectrum was 1.8 Hz/point.
